# Supplementary material for: WITHDRAWN: Stroke burden attributable to hypertension in G20 countries, 1990–2021: a systematic analysis with forecasts to 2050
Source: Research Square preprint supplement (doi:10.21203/rs.3.rs-6552113/v1), 2025-05-14
Supplement: Supplementary file 1 [file 450e193d2100df6c0583120a.docx]

**Supplemental Materials**


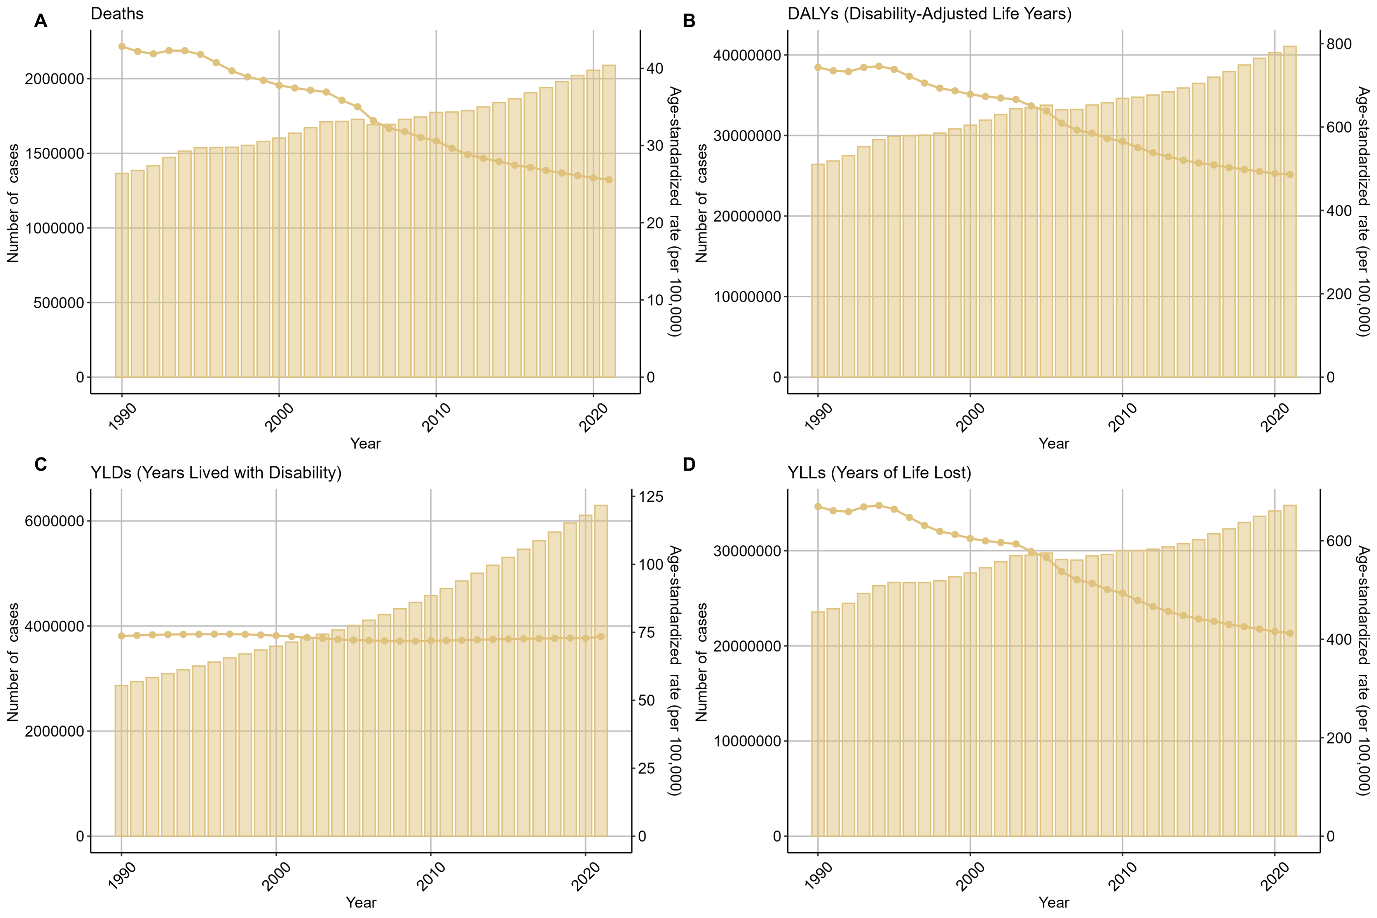


**Figure S1. The numbers and age-standardized rates of mortality, DALYs ,YLDs, and YLLs of ischemic stroke attributable to hypertension in G20 countries from 1990 to 2021.**

**A**, Mortality. **B**, DALYs. **C**, YLDs. **D**, YLLs. Bars and broken lines indicate numbers and age-standardized rates, respectively. DALYs, disability-adjusted life years. YLDs, years lived with disability. YLLs, years of life lost.


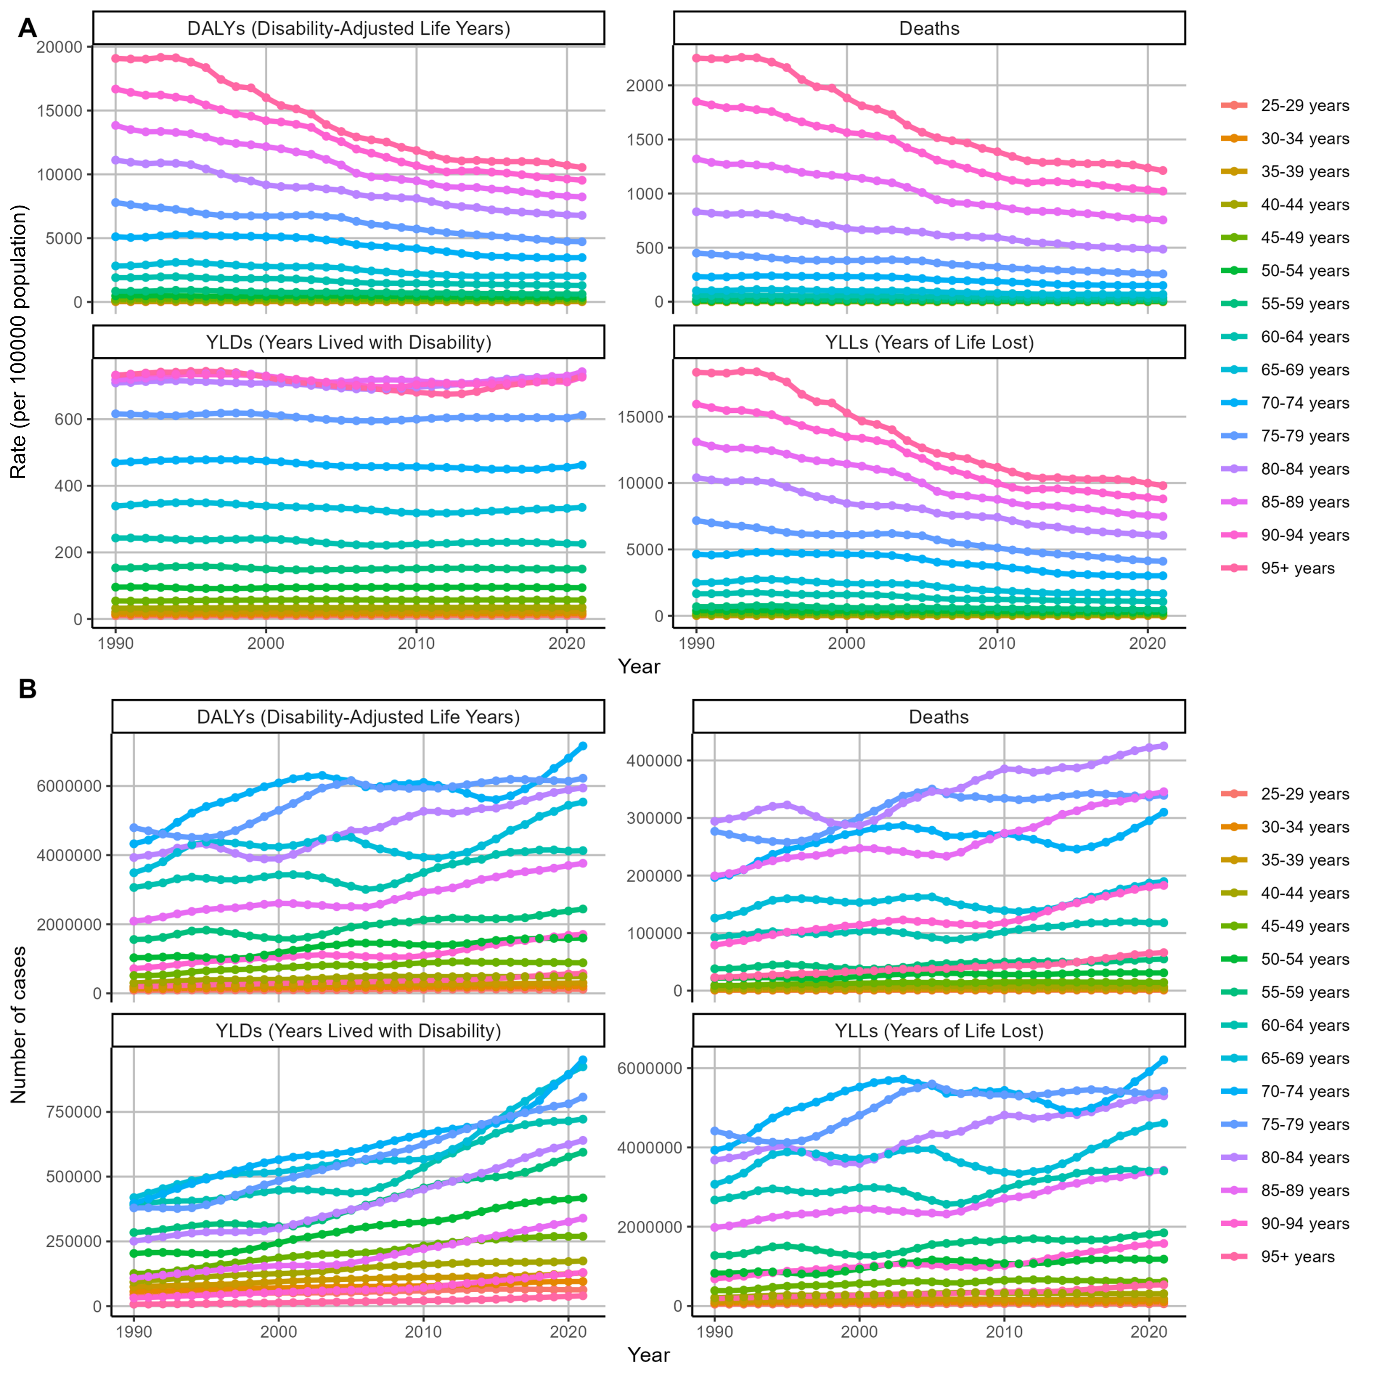


**Figure S2. Bueden of ischemic stroke attributable to hypertension in G20 countries from 1990 to 2021, by age.**

**A**, Age-standardized rates of DALYs, mortality, YLDs, and YLLs. **B**, Numbers of DALYs, mortality, YLDs, and YLLs. DALYs, disability-adjusted life years. YLDs, years lived with disability. YLLs, years of life lost.


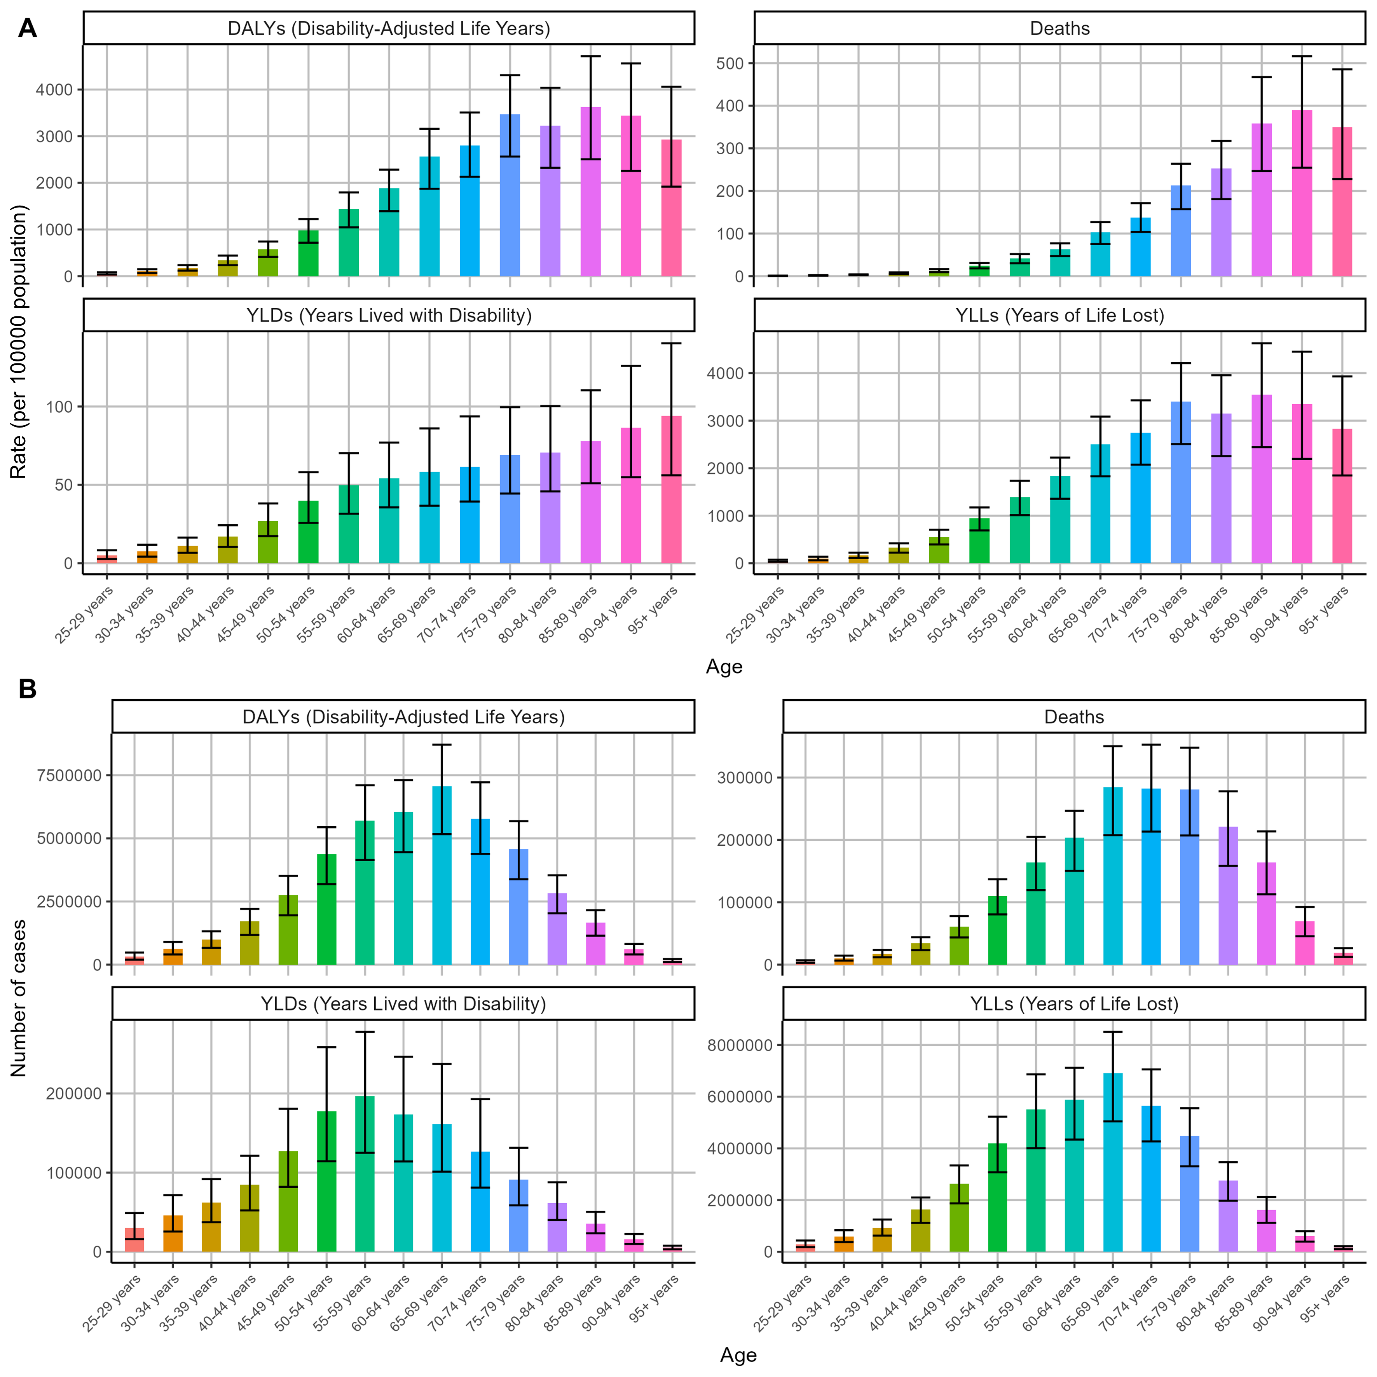


**Figure S3. Bueden of ischemic stroke attributable to hypertension in G20 countries in 2021, by age.**

**A**, Rates of DALYs, mortality, YLDs, and YLLs. **B**, Numbers of DALYs, mortality, YLDs, and YLLs. DALYs, disability-adjusted life years. YLDs, years lived with disability. YLLs, years of life lost.


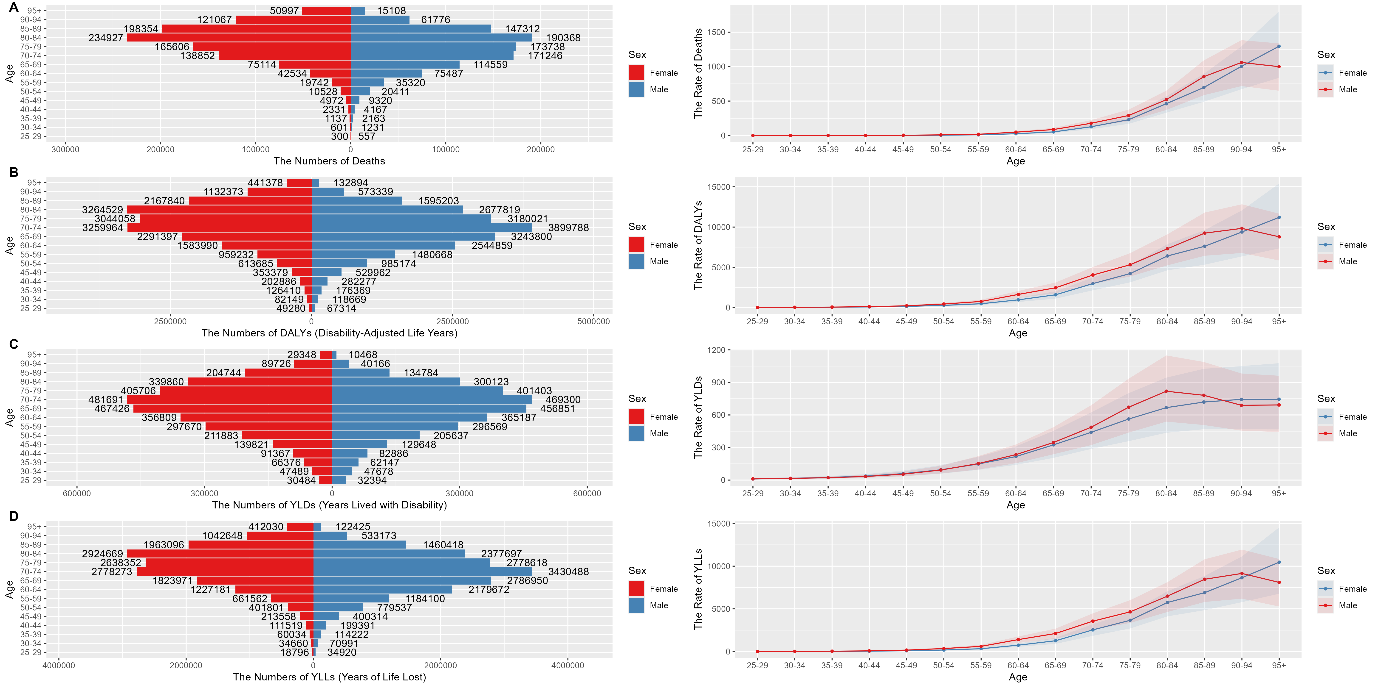


**Figure S4. Burden of ischemic stroke attributable to hypertension in G20 countries in 2021, by sex and age.**

**A**, Mortality. **B**, DALYs. **C**, YLDs. **D**, YLLs. DALYs, disability-adjusted life years. YLDs, years lived with disability. YLLs, years of life lost.


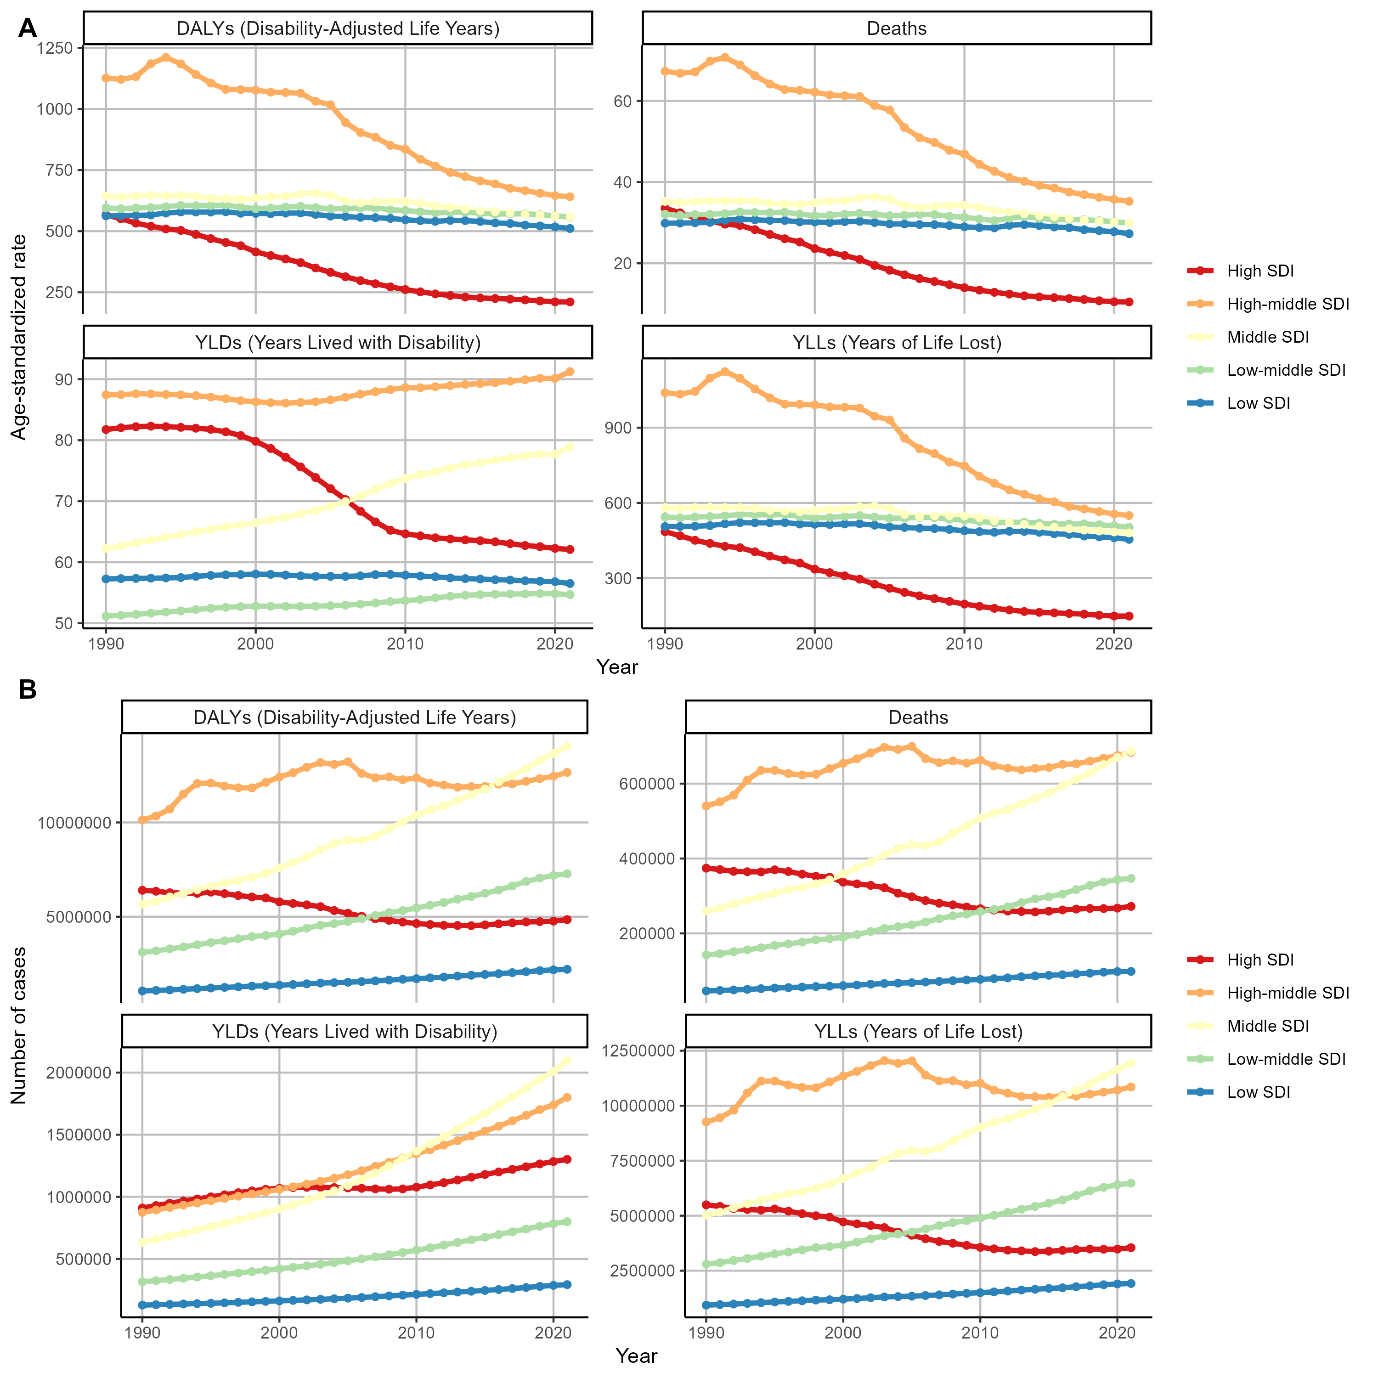


**Figure S5. Bueden of ischemic stroke attributable to hypertension in G20 countries from 1990 to 2021, by SDI.**

**A**, Age-standardized rates of DALYs, mortality, YLDs, and YLLs. **B**, Numbers of DALYs, mortality, YLDs, and YLLs. DALYs, disability-adjusted life years. YLDs, years lived with disability. YLLs, years of life lost.


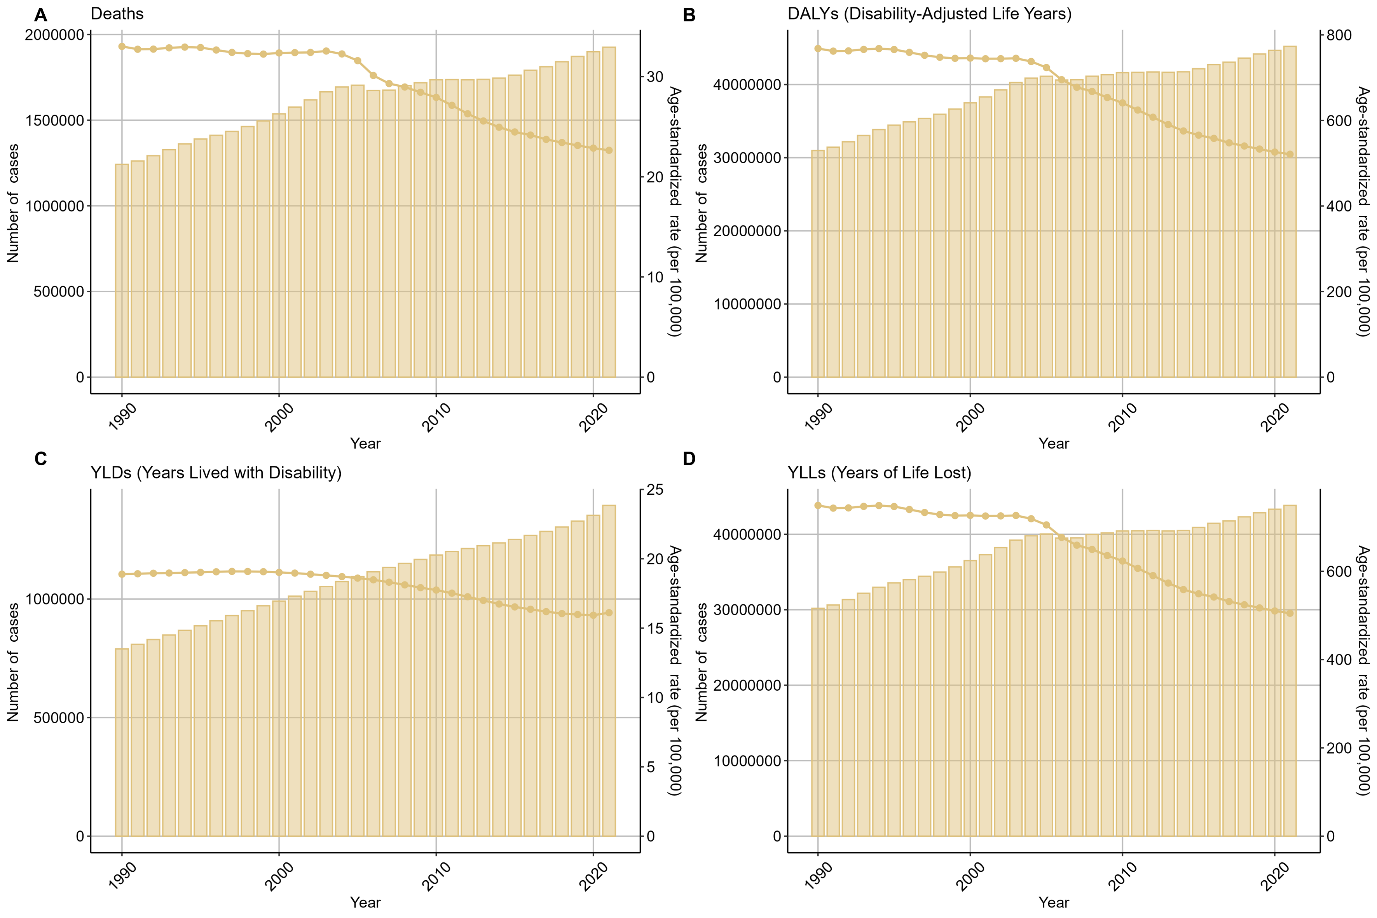


**Figure S6. The numbers and age-standardized rates of mortality, DALYs ,YLDs, and YLLs of intracerebral hemorrhage attributable to hypertension in G20 countries from 1990 to 2021.**

**A**, Mortality. **B**, DALYs. **C**, YLDs. **D**, YLLs. Bars and broken lines indicate numbers and age-standardized rates, respectively. DALYs, disability-adjusted life years. YLDs, years lived with disability. YLLs, years of life lost.


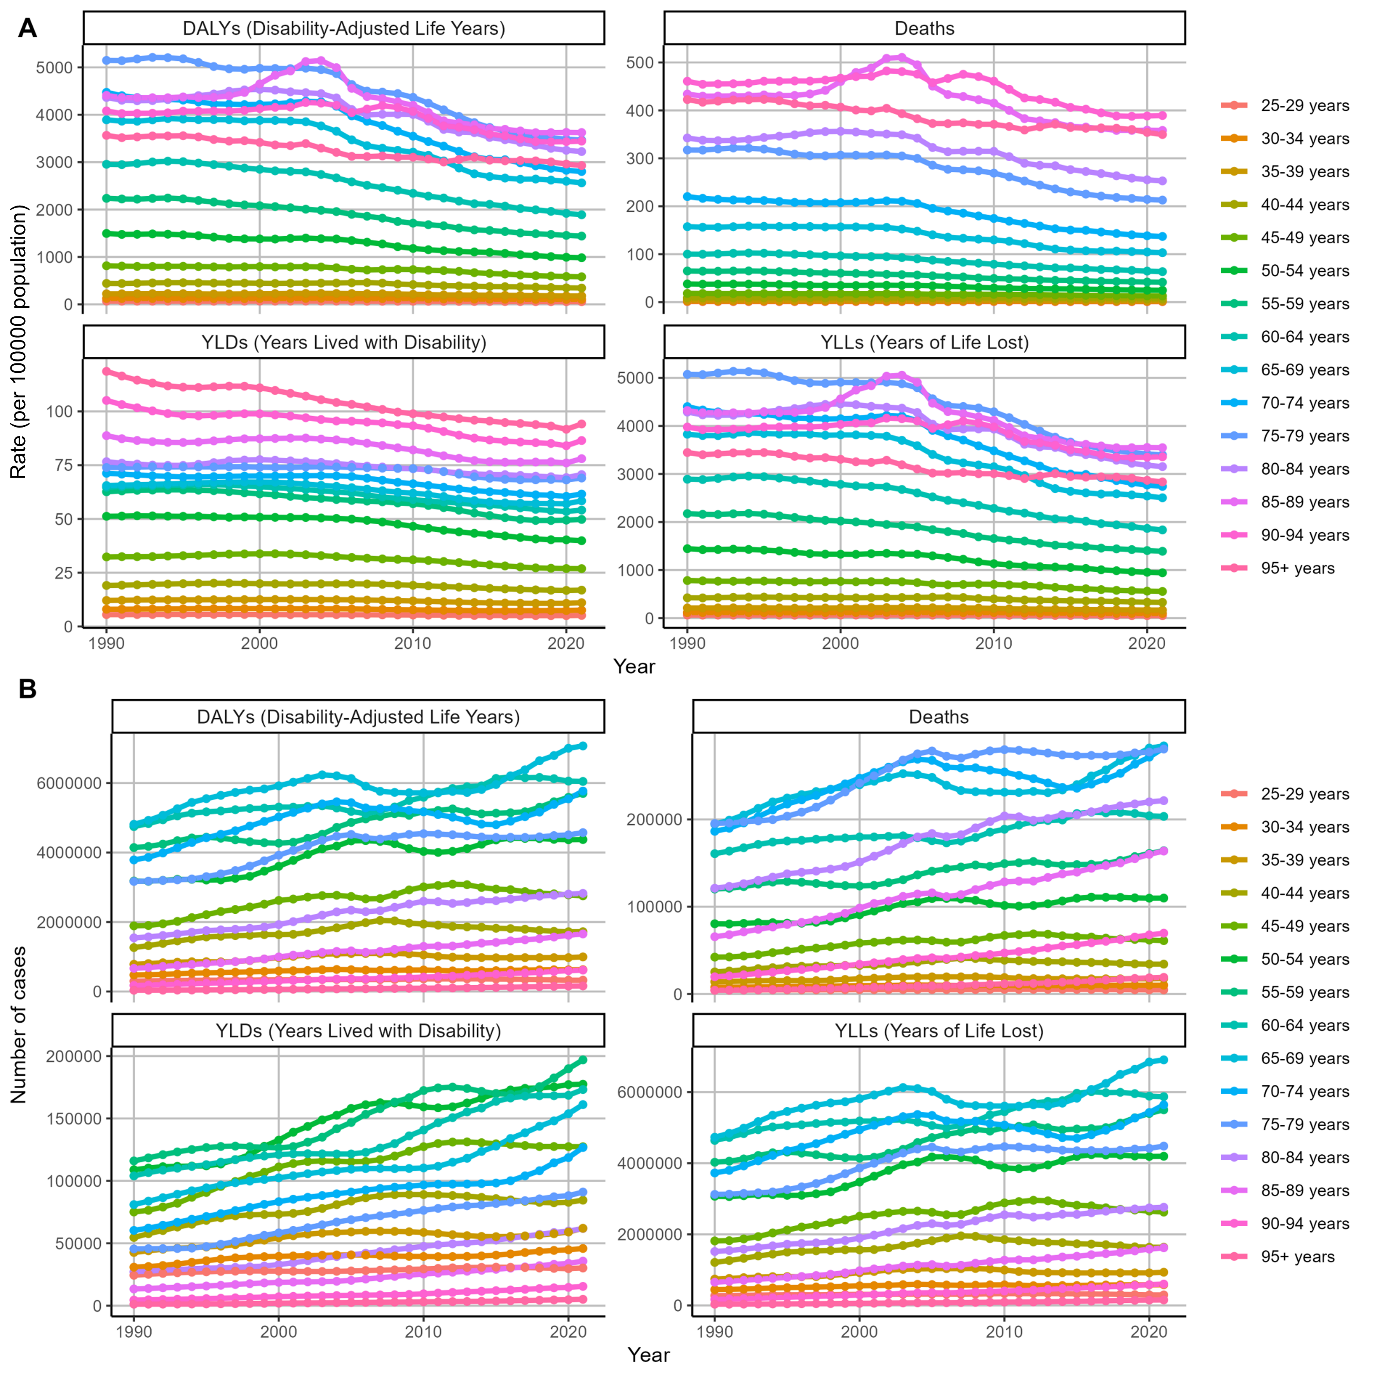


**Figure S7. Burden of intracerebral hemorrhage attributable to hypertension in G20 countries from 1990 to 2021, by age.**

**A**, Age-standardized rates of DALYs, mortality, YLDs, and YLLs. **B**, Numbers of DALYs, mortality, YLDs, and YLLs. DALYs, disability-adjusted life years. YLDs, years lived with disability. YLLs, years of life lost.


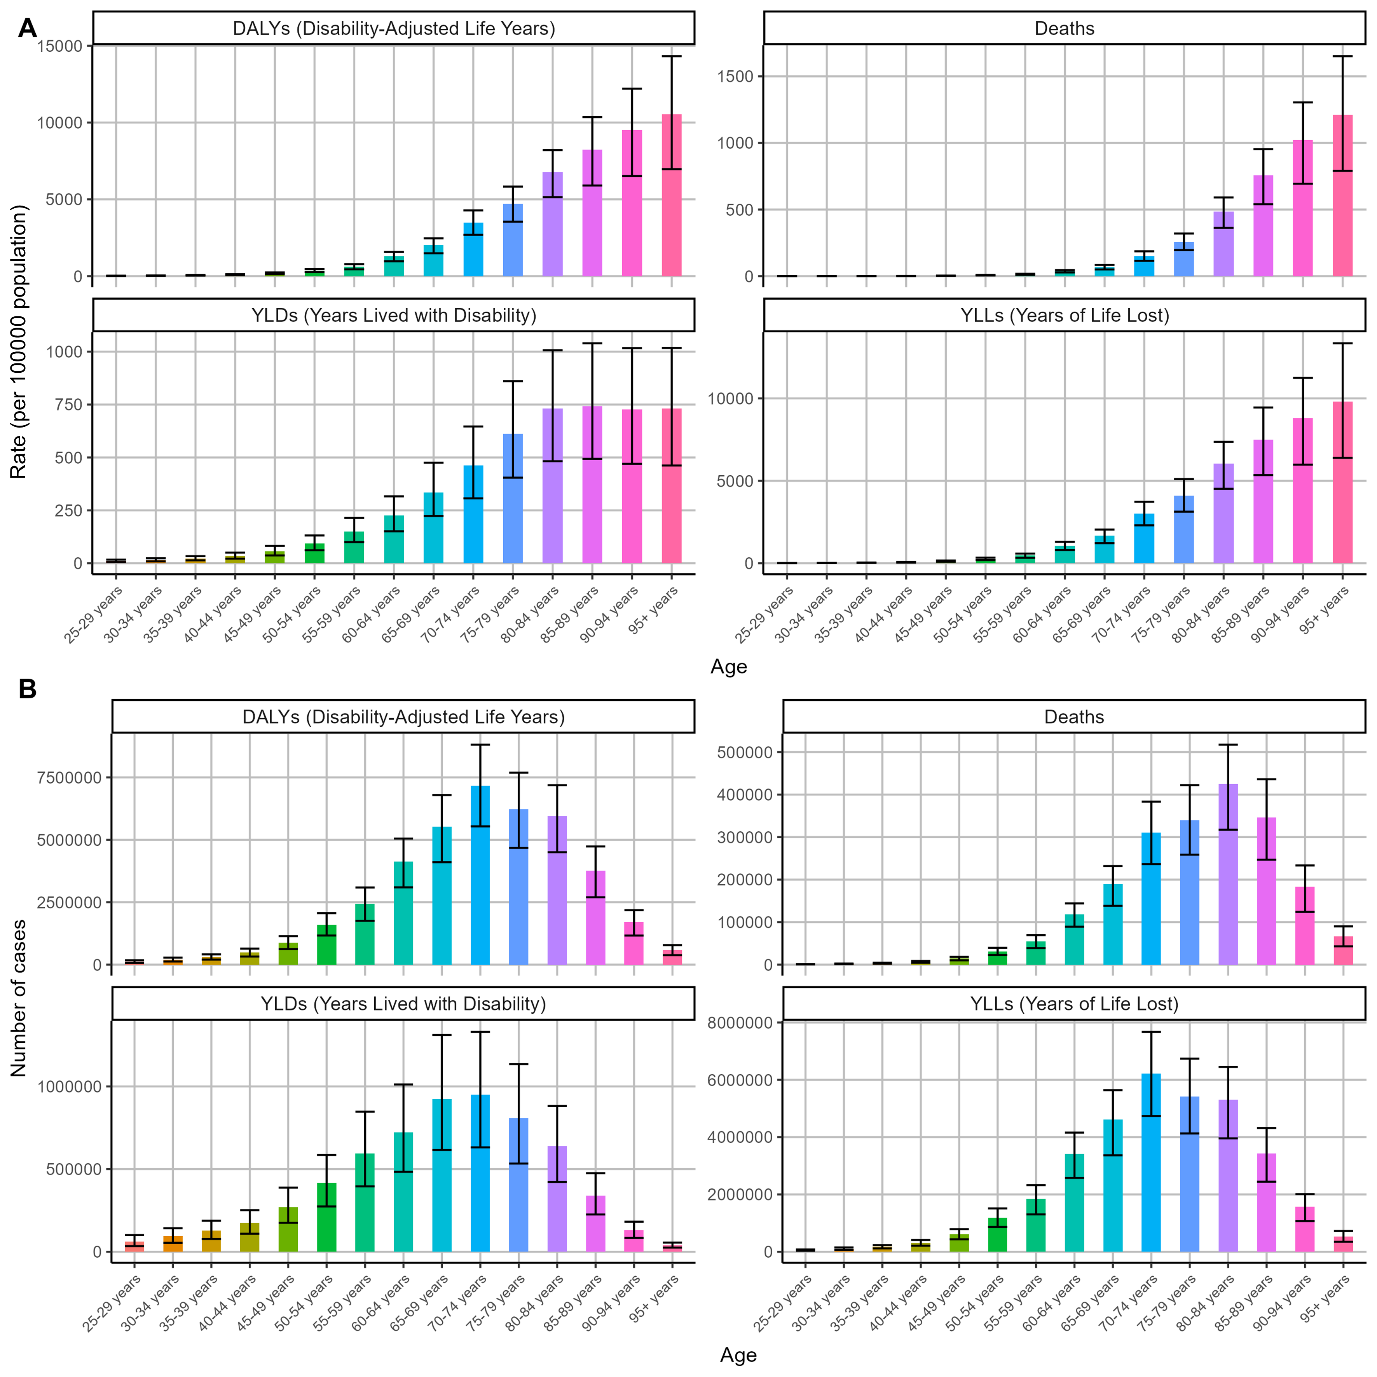


**Figure S8. Bueden of intracerebral hemorrhage attributable to hypertension in G20 countries in 2021, by age.**

**A**, Rates of DALYs, mortality, YLDs, and YLLs. **B**, Numbers of DALYs, mortality, YLDs, and YLLs. DALYs, disability-adjusted life years. YLDs, years lived with disability. YLLs, years of life lost.


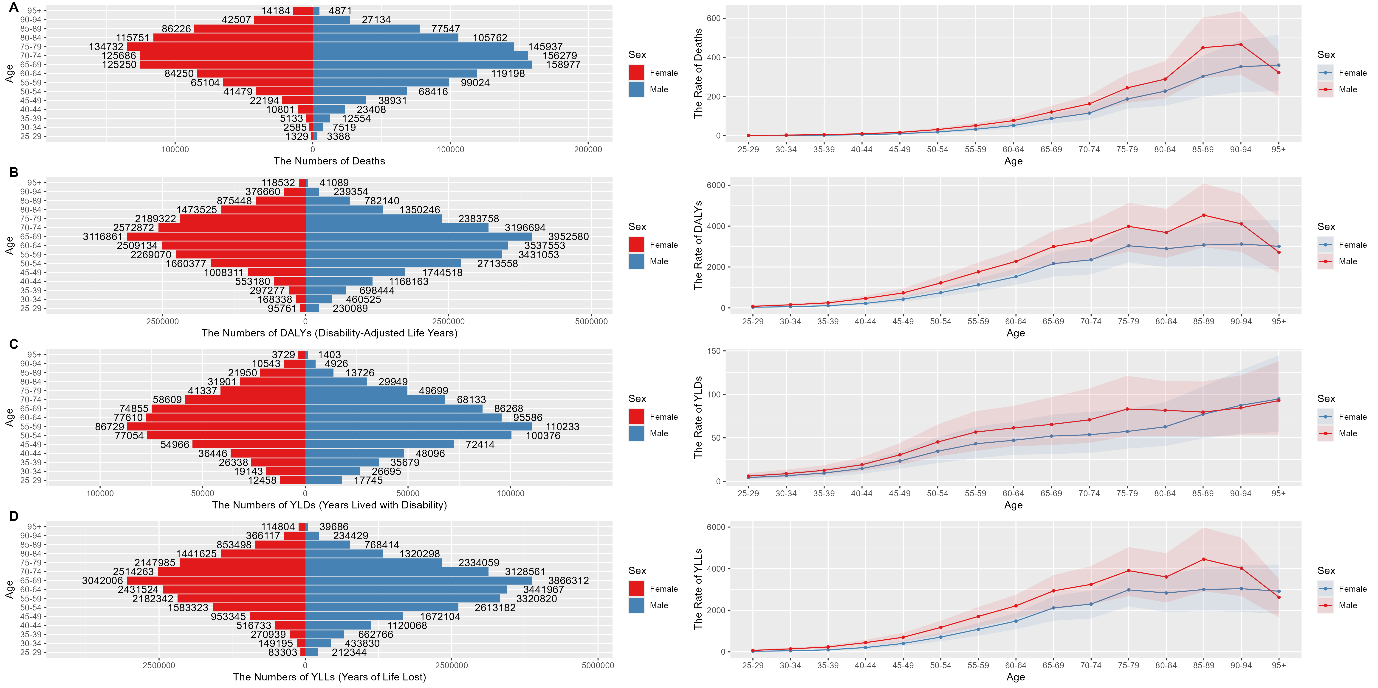


**Figure S9. Burden of intracerebral hemorrhage attributable to hypertension in G20 countries in 2021, by sex and age.**

**A**, Mortality. **B**, DALYs. **C**, YLDs. **D**, YLLs. DALYs, disability-adjusted life years. YLDs, years lived with disability. YLLs, years of life lost.


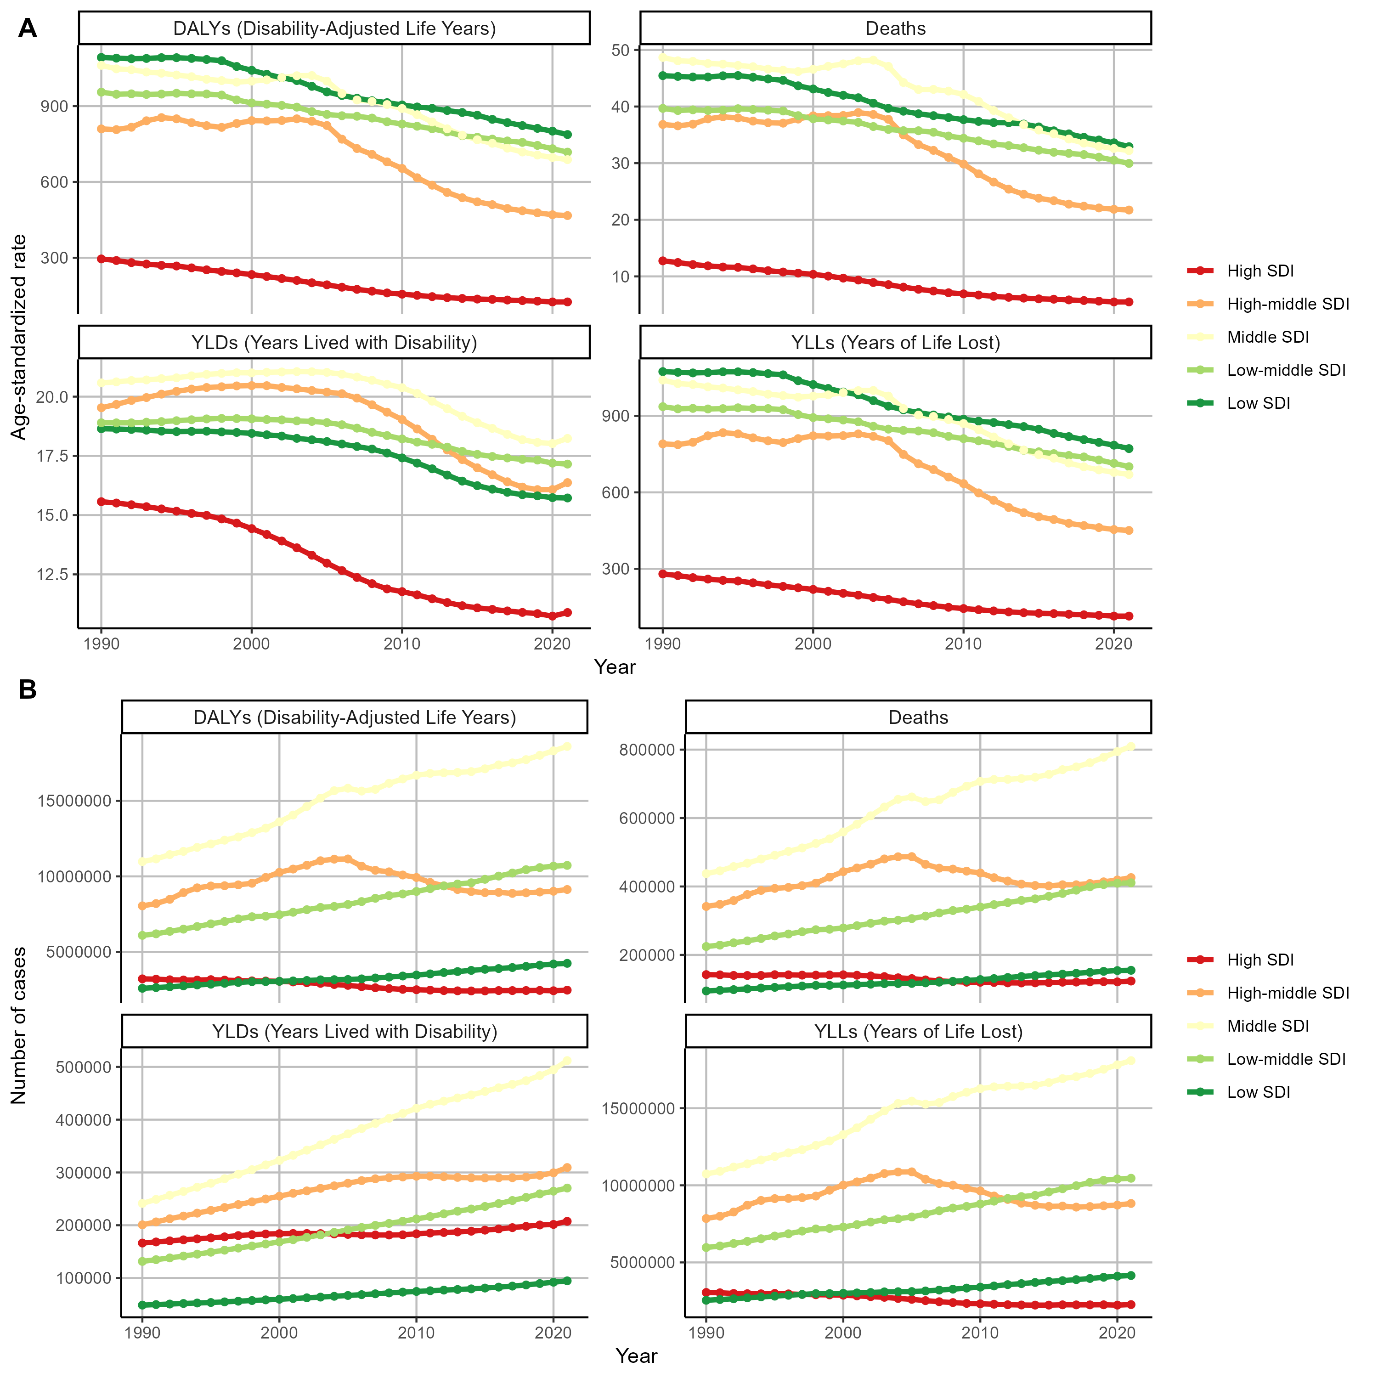


**Figure S10. Burden of intracerebral hemorrhage attributable to hypertension in G20 countries from 1990 to 2021, by SDI.**

**A**, Age-standardized rates of DALYs, mortality, YLDs, and YLLs. **B**, Numbers of DALYs, mortality, YLDs, and YLLs. DALYs, disability-adjusted life years. YLDs, years lived with disability. YLLs, years of life lost.


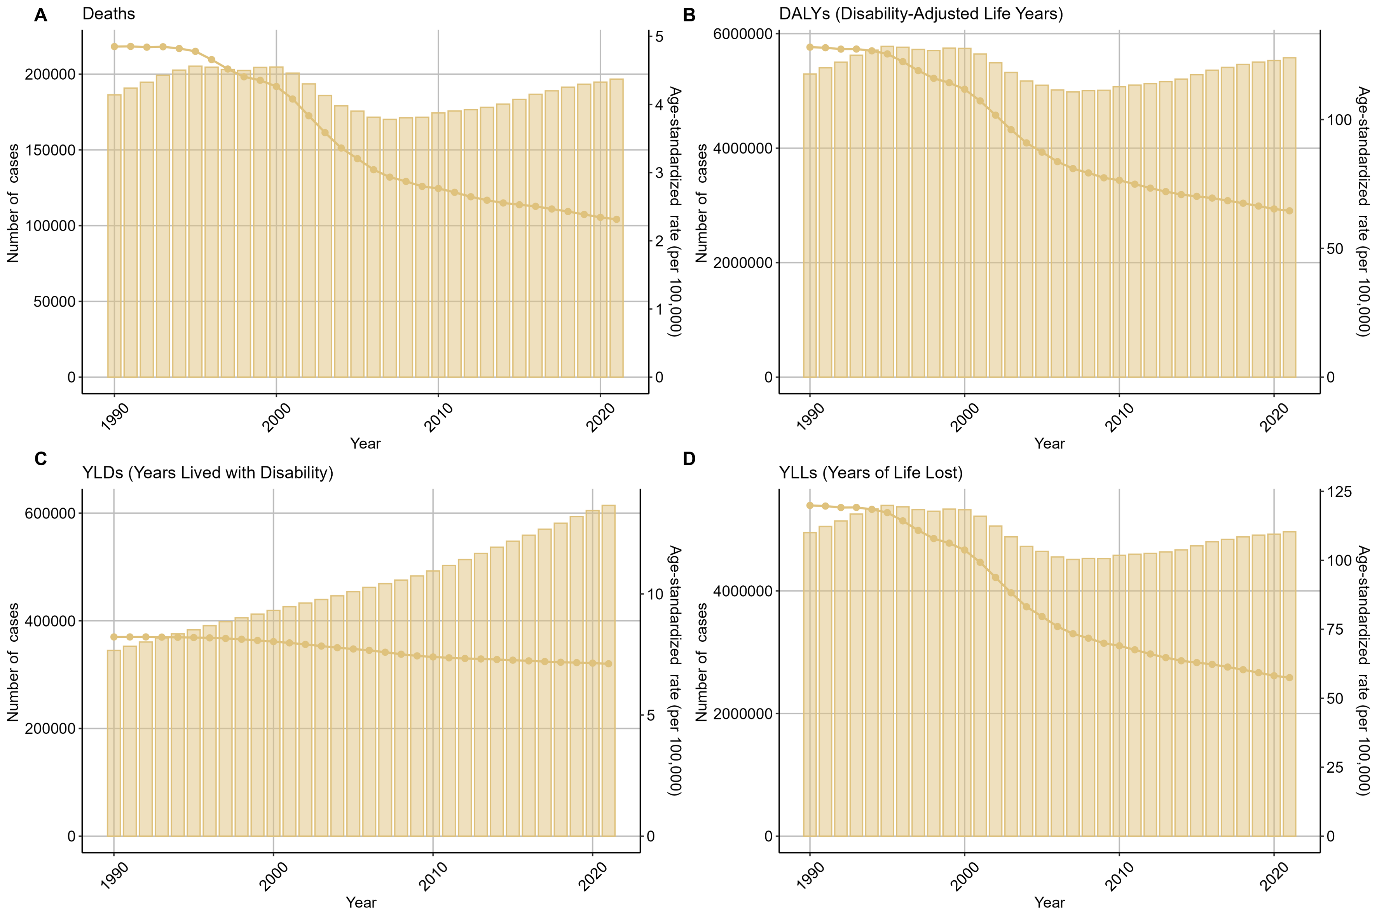


**Figure S11. The numbers and age-standardized rates of mortality, DALYs ,YLDs, and YLLs of subarachnoid hemorrhage attributable to hypertension in G20 countries from 1990 to 2021.**

**A**, Mortality. **B**, DALYs. **C**, YLDs. **D**, YLLs. Bars and broken lines indicate numbers and age-standardized rates, respectively. DALYs, disability-adjusted life years. YLDs, years lived with disability. YLLs, years of life lost.


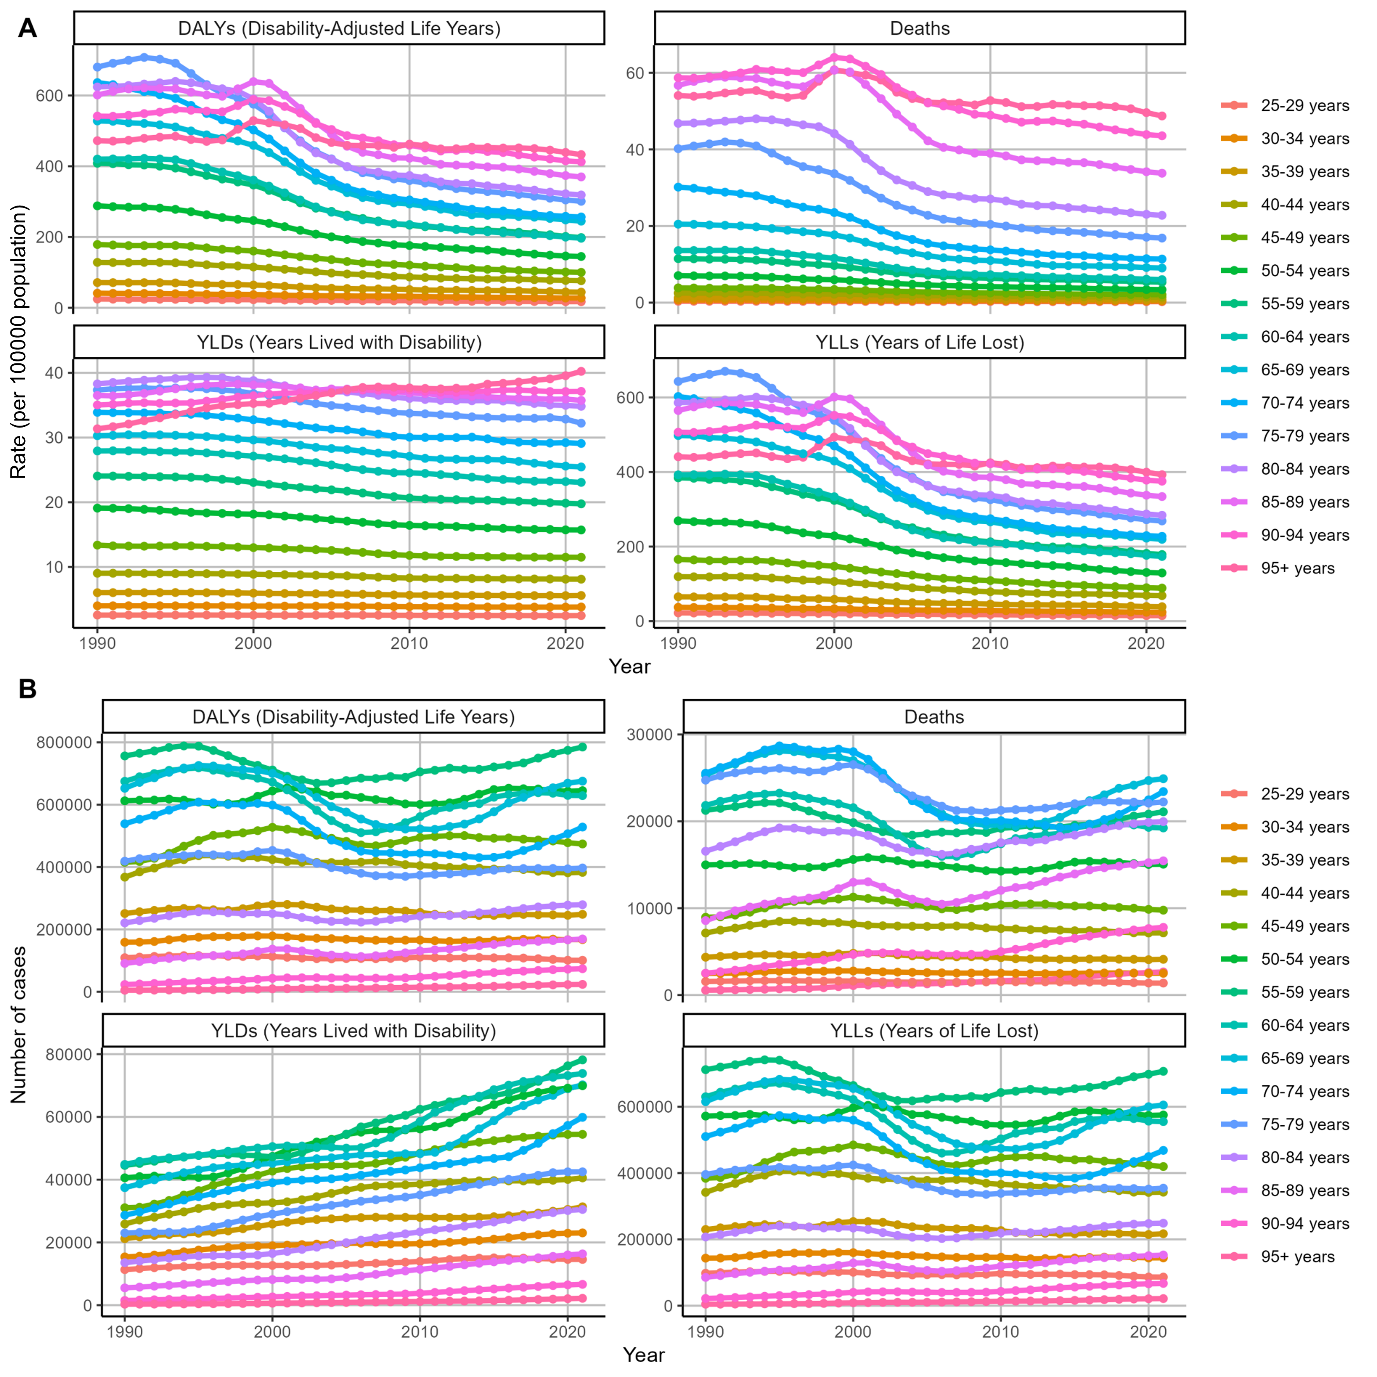


**Figure S12. Burden of subarachnoid hemorrhage attributable to hypertension in G20 countries in 2021, by age.**

**A**, Age-standardized rates of DALYs, mortality, YLDs, and YLLs. **B**, Numbers of DALYs, mortality, YLDs, and YLLs. DALYs, disability-adjusted life years. YLDs, years lived with disability. YLLs, years of life lost.


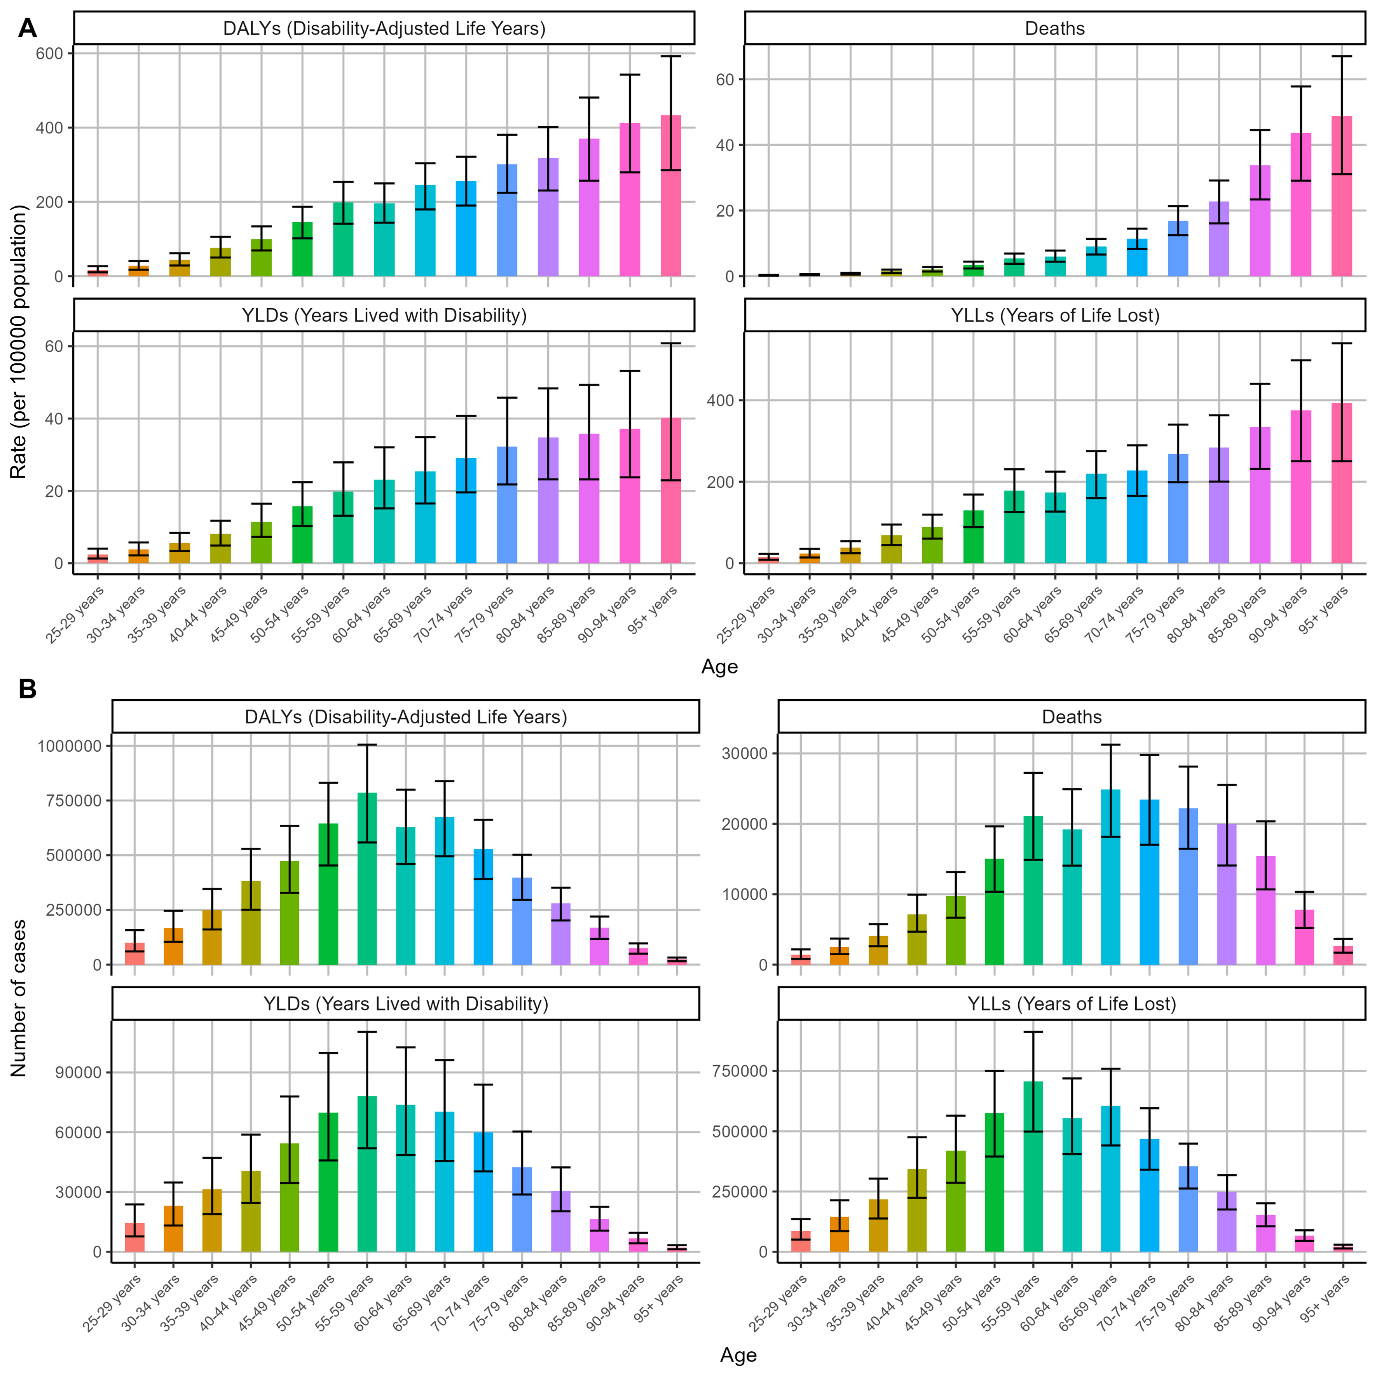


**Figure S13. Bueden of subarachnoid hemorrhage attributable to hypertension in G20 countries in 2021, by age.**

**A**, Rates of DALYs, mortality, YLDs, and YLLs. **B**, Numbers of DALYs, mortality, YLDs, and YLLs. DALYs, disability-adjusted life years. YLDs, years lived with disability. YLLs, years of life lost.


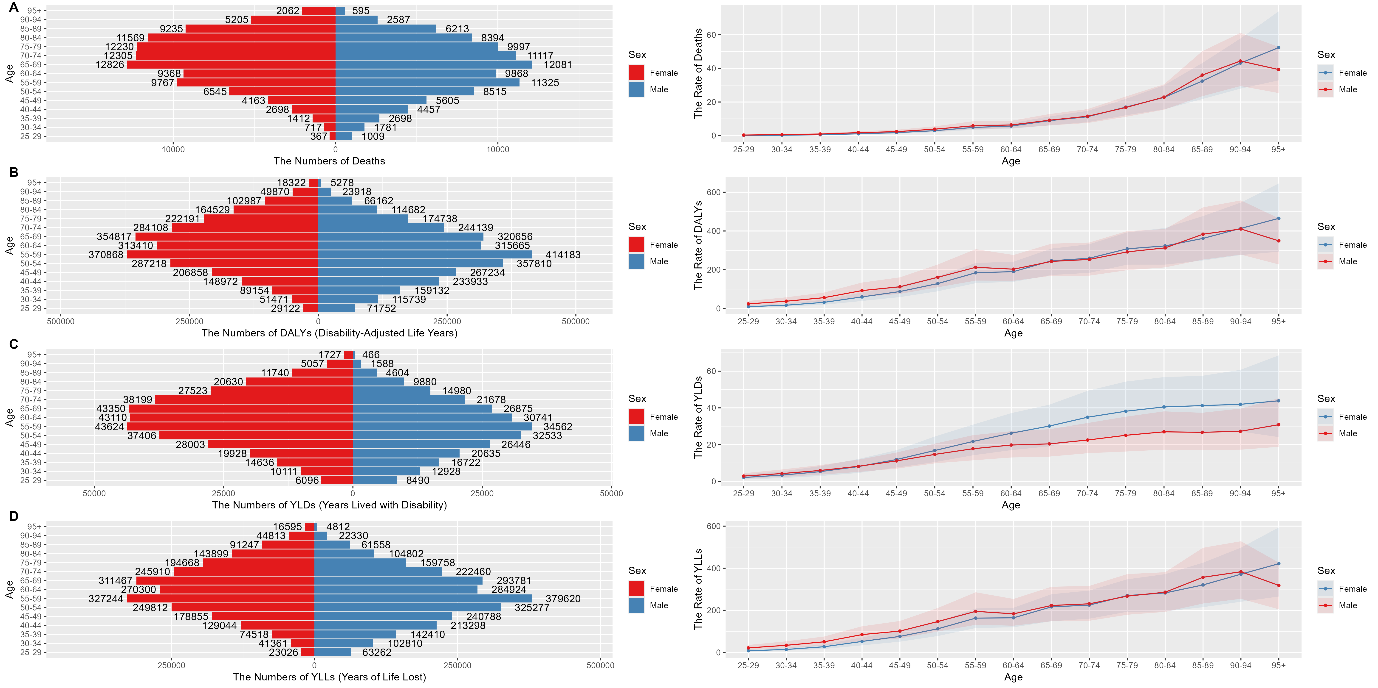


**Figure S14. Burden of subarachnoid hemorrhage attributable to hypertension in G20 countries in 2021, by sex and age.**

**A**, Mortality. **B**, DALYs. **C**, YLDs. **D**, YLLs. DALYs, disability-adjusted life years. YLDs, years lived with disability. YLLs, years of life lost.


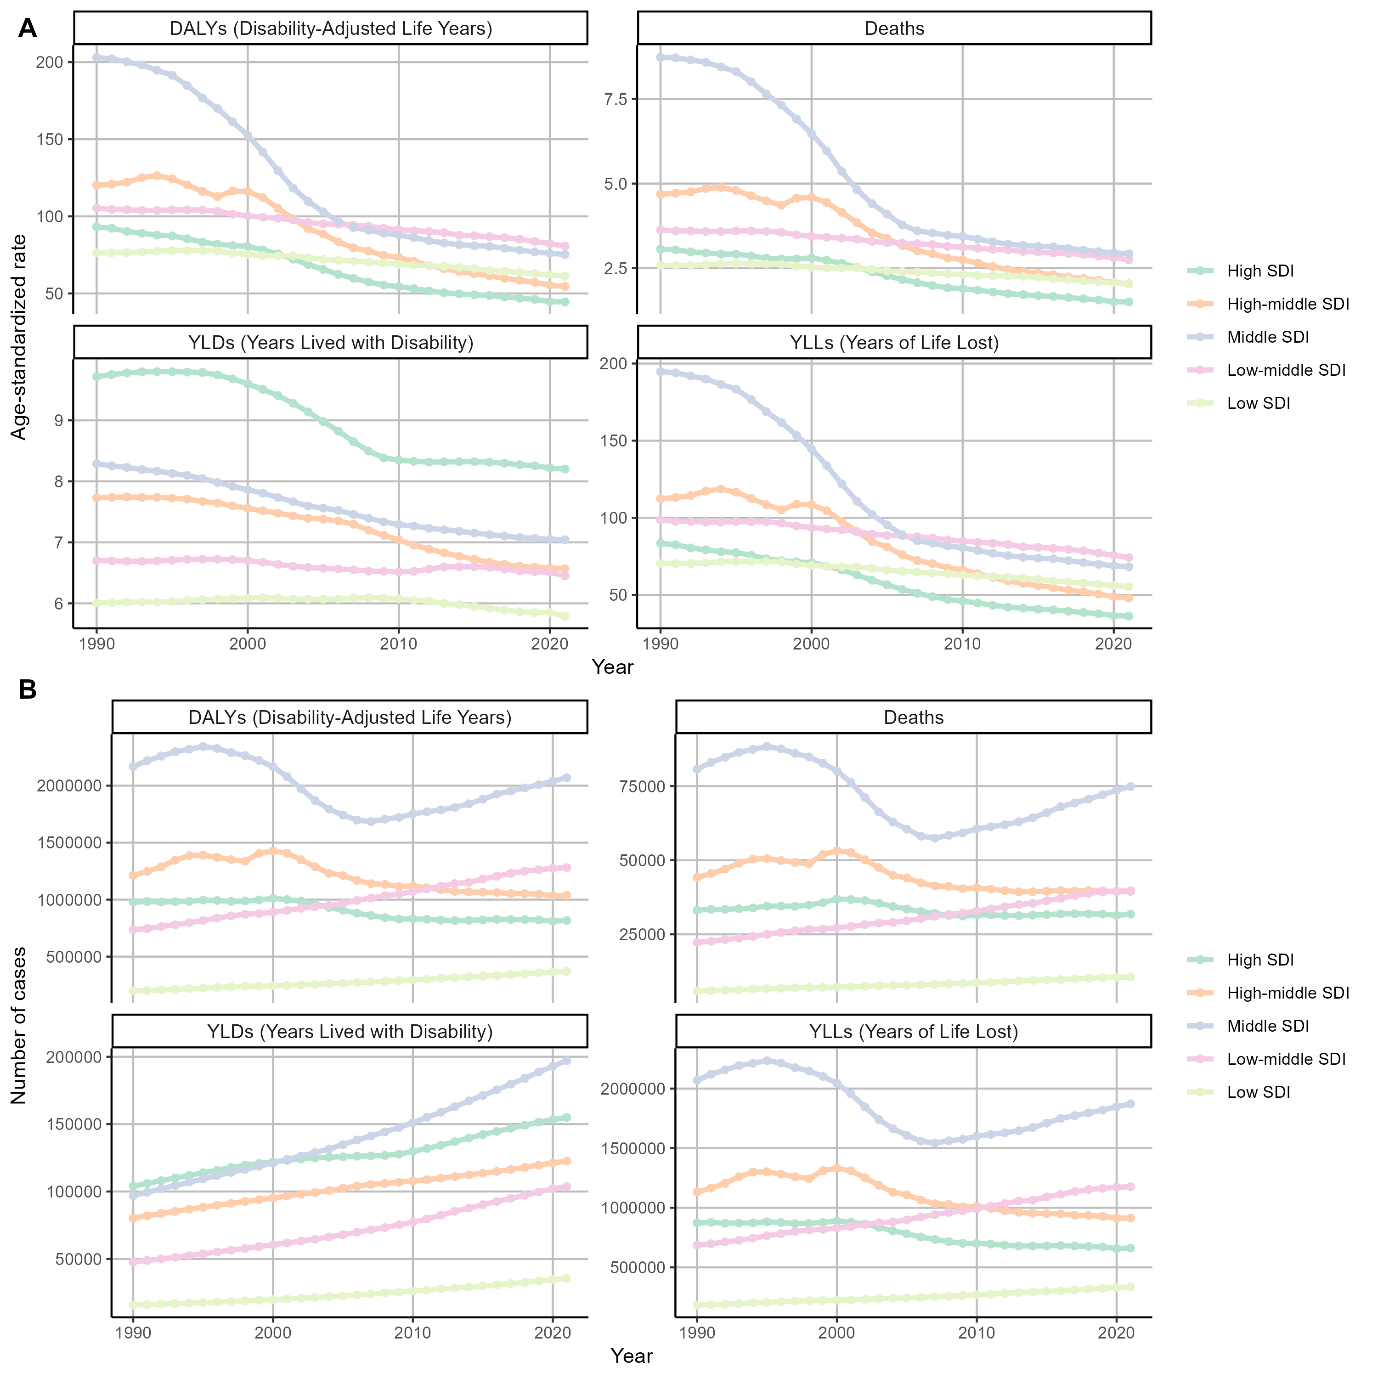


**Figure S15. Burden of subarachnoid hemorrhage attributable to hypertension in G20 countries from 1990 to 2021, by SDI.**

**A**, Age-standardized rates of DALYs, mortality, YLDs, and YLLs. **B**, Numbers of DALYs, mortality, YLDs, and YLLs. DALYs, disability-adjusted life years. YLDs, years lived with disability. YLLs, years of life lost.

**Table S1. Burden of stroke attributable to hypertension in G20 countries, by nations, 1990–2021**

|  |  |  | DALYs |  |  |  |  |  | Mortality |  |  |
| --- | --- | --- | --- | --- | --- | --- | --- | --- | --- | --- | --- |
| **1990 cases**  **(×100000, 95% UI)** | **1990 ASDALYR**  **(per 100000, 95% UI)** | **2021 cases**  **(×100000, 95% UI)** | **2021 ASDALYR**  **(per 100000, 95% UI)** | **1990–2021 EAPC**  **(95% CI)** |  | **1990 cases**  **(×100000, 95% UI)** | **1990 ASMR**  **(per 100000, 95% UI)** | **2021 cases**  **(×100000, 95% UI)** | **2021 ASMR**  **(per 100000, 95% UI)** | **1990–2021 EAPC**  **(95% CI)** |
| Overall | 264.23 (198.37–317.92) | 743.20 (558.75–893.21) | 410.61 (311.46–502.01) | 485.90 (368.95–593.66) | −0.83 (−1.15 to −0.51) |  | 13.66 (10.23–16.45) | 42.84 (31.84–51.58) | 20.90 (15.71–25.74) | 25.57 (19.16–31.56) | −0.99 (−1.4 to −0.57) |
| Country |  |  |  |  |  |  |  |  |  |  |  |
| Argentina | 1.35 (0.92–1.76) | 447.25 (304.87–577.60) | 1.25 (0.93–1.54) | 215.23 (160.04–265.7) | −1.4 (−1.61 to −1.20) |  | 0.08 (0.05–0.10) | 27.51 (19.7–35.80) | 0.07 (0.05–0.08) | 11.25 (8.29–13.86) | −1.68 (−1.92 to −1.44) |
| Australia | 0.84 (0.63–1.01) | 438.89 (328.50–528.16) | 0.63 (0.45–0.80) | 124.07 (88.80–157.63) | −3.58 (−4.19 to −2.97) |  | 0.05 (0.04–0.06) | 28.08 (20.7–34.34) | 0.04 (0.03–0.05) | 6.66 (4.60–8.67) | −3.88 (−4.55 to −3.21) |
| Brazil | 6.11 (4.52–7.36) | 781.33 (581.76–941.70) | 7.24 (5.35–8.83) | 296.8 (218.92–362.27) | −1.89 (−2.38 to −1.39) |  | 0.31 (0.23–0.37) | 45.18 (33.6–54.86) | 0.39 (0.29–0.49) | 16.63 (12.15–20.47) | −1.69 (−2.28 to −1.10) |
| Canada | 1.09 (0.82–1.33) | 335.07 (252.35–410.02) | 1.04 (0.75–1.34) | 131.73 (93.84–168.76) | −2.44 (−3.11 to −1.77) |  | 0.06 (0.05–0.08) | 19.60 (14.20–24.20) | 0.06 (0.04–0.07) | 6.36 (4.31–8.17) | −2.89 (−3.63 to −2.15) |
| China | 47.26 (33.25–62.71) | 669.00 (475.20–876.40) | 134.94 (95.99–176.69) | 669.45 (475.53–878.06) | 1.47 (1.06 to 1.88) |  | 2.13 (1.49–2.82) | 36.78 (25.98–48.26) | 6.72 (4.67–9.02) | 36.26 (25.27–48.78) | 1.62 (1.05 to 2.20) |
| France | 3.54 (2.66–4.26) | 391.70 (292.38–469.53) | 2.43 (1.74–3.04) | 140.22 (103.36–176.13) | −2.5 (−3.42 to −1.58) |  | 0.24 (0.18–0.30) | 26.16 (19.25–32.00) | 0.16 (0.11–0.21) | 7.52 (5.26–9.60) | −2.95 (−3.99 to −1.90) |
| Germany | 10.16 (7.83–12.00) | 745.63 (573.91–881.73) | 4.98 (3.66–6.19) | 222.13 (166.39–275.43) | −3.25 (−4.24 to −2.24) |  | 0.63 (0.48–0.75) | 45.75 (34.57–54.97) | 0.27 (0.19–0.35) | 10.76 (7.60–13.44) | −3.78 (−4.85 to −2.70) |
| India | 15.60 (10.76–21.15) | 396.59 (273.99–530.66) | 37.74 (26.48–50.57) | 344.23 (242.19–456.89) | 0.20 (−0.54 to 0.96) |  | 0.67 (0.45–0.91) | 20.50 (13.98–27.64) | 1.79 (1.26–2.33) | 18.31 (12.94–24.02) | 0.48 (−0.47 to 1.44) |
| Indonesia | 7.34 (5.55–9.29) | 915.81 (684.64–1152.24) | 22.98 (16.21–30.66) | 1202.56 (858.41–1573.74) | 1.66 (0.80 to 2.53) |  | 0.31 (0.23–0.40) | 48.52 (35.29–62.06) | 1.04 (0.73–1.39) | 68.50 (49.06–90.40) | 1.88 (0.74 to 3.03) |
| Italy | 5.80 (4.51–6.85) | 633.92 (494.09–752.70) | 2.63 (1.82–3.36) | 140.23 (98.26–177.54) | −4.33 (−5.44 to −3.22) |  | 0.38 (0.30–0.46) | 43.05 (32.98–51.92) | 0.20 (0.13–0.26) | 9.16 (6.00–11.93) | −4.21 (−5.39 to −3.02) |
| Japan | 9.29 (7.06–11.03) | 578.43 (436.06–689.74) | 7.59 (5.44–9.65) | 169.38 (122.97–213.41) | −2.72 (−3.84 to −1.60) |  | 0.53 (0.40–0.64) | 35.35 (26.33–42.75) | 0.45 (0.31–0.60) | 7.56 (5.26–9.81) | −3.16 (−4.44 to −1.87) |
| Mexico | 1.21 (0.87–1.53) | 330.30 (238.06–416.68) | 2.11 (1.53–2.62) | 177.31 (129.37–221.41) | −0.74 (−1.46 to −0.01) |  | 0.06 (0.05–0.08) | 19.91 (14.49–25.40) | 0.11 (0.08–0.14) | 9.67 (6.93–12.18) | −0.82 (−1.67 to 0.04) |
| Republic of Korea | 2.66 (1.90–3.30) | 1140.29 (819.29–1401.24) | 1.97 (1.30–2.59) | 210.62 (138.93–277.61) | −4.60 (−5.15 to −4.05) |  | 0.12 (0.09–0.15) | 65.37 (47.63–81.01) | 0.10 (0.07–0.14) | 11.32 (7.19–15.51) | −4.59 (−5.25 to −3.93) |
| Russian Federation | 33.26 (25.33–39.08) | 1963.05 (1494.24–2312.20) | 25.83 (19.55–30.81) | 1066.26 (806.03–1272.52) | −2.22 (−2.78 to −1.65) |  | 1.78 (1.35–2.09) | 115.30 (87.28–136.26) | 1.48 (1.11–1.79) | 61.07 (45.79–73.82) | −2.10 (−2.63 to −1.58) |
| Saudi Arabia | 0.50 (0.33–0.68) | 978.32 (644.65–1330.62) | 1.14 (0.78–1.49) | 695.57 (493.63–905.17) | −0.96 (−2.34 to 0.44) |  | 0.02 (0.02–0.03) | 54.03 (35.79–73.95) | 0.04 (0.03–0.05) | 38.42 (27.34–50.19) | −1.35 (−3.11 to 0.44) |
| South Africa | 1.04 (0.75–1.28) | 550.15 (394.21–680.37) | 2.60 (1.99–3.16) | 650.06 (493.14–788.21) | 1.13 (0.32 to 1.94) |  | 0.05 (0.03–0.06) | 27.34 (18.66–34.63) | 0.13 (0.09–0.15) | 36.24 (27.04–44.00) | 1.51 (0.54 to 2.50) |
| Turkey | 2.53 (1.79–3.24) | 838.72 (595.08–1067.35) | 3.76 (2.63–4.86) | 435.37 (304.72–561.53) | −1.09 (−1.58 to −0.60) |  | 0.13 (0.09–0.16) | 47.13 (33.63–60.71) | 0.21 (0.14–0.28) | 25.97 (17.86–34.45) | −0.53 (−1.14 to 0.09) |
| United Kingdom | 6.41 (5.01–7.43) | 654.47 (509.12–761.20) | 2.04 (1.48–2.54) | 137.64 (99.5–172.65) | −5.16 (−6.02 to −4.29) |  | 0.41 (0.32–0.48) | 41.76 (32.48–48.94) | 0.13 (0.09–0.16) | 7.69 (5.46–9.65) | −5.40 (−6.34 to −4.45) |
| United States of America | 10.87 (8.13–13.16) | 322.59 (240.9–391.42) | 11.20 (7.97–14.39) | 181.59 (129.21–233.07) | −2.04 (−2.68 to −1.40) |  | 0.61 (0.46–0.74) | 17.85 (13.35–21.68) | 0.62 (0.43–0.79) | 9.28 (6.46–11.91) | −2.24 (−2.96 to −1.51) |

DALYs, disability-adjusted life years. ASDALYR, age-standardized disability adjusted of life years rate. ASMR, age-standardized mortality rate. EAPC, estimated annual percentage change.

**Table S2. Burden of intracerebral hemorrhage attributable to hypertension in G20 countries, by nations, 1990–2021**

|  |  |  | DALYs |  |  |  |  |  | Mortality |  |  |
| --- | --- | --- | --- | --- | --- | --- | --- | --- | --- | --- | --- |
| **1990 cases**  **(×100000, 95% UI)** | **1990 ASDALYR**  **(per 100000, 95% UI)** | **2021 cases**  **(×100000, 95% UI)** | **2021 ASDALYR**  **(per 100000, 95% UI)** | **1990–2021 EAPC**  **(95% CI)** |  | **1990 cases**  **(×100000, 95% UI)** | **1990 ASMR**  **(per 100000, 95% UI)** | **2021 cases**  **(×100000, 95% UI)** | **2021 ASMR**  **(per 100000, 95% UI)** | **1990–2021 EAPC**  **(95% CI)** |
| Overall | 309.75 (226.73–383.68) | 768.15 (563.15–949.55) | 452.14 (337.14–553.88) | 521.09 (388.7–638.08) | −0.79 (−1.03 to −0.55) |  | 12.42 (9.17–15.29) | 33.01 (24.32–40.66) | 19.26 (14.49–23.62) | 22.64 (17–27.76) | −0.68 (−0.98 to −0.38) |
| Country |  |  |  |  |  |  |  |  |  |  |  |
| Argentina | 1.62 (1.08–2.12) | 502.29 (335.77–658.71) | 1.27 (0.92–1.54) | 230.96 (167.58–280.88) | −1.99 (−2.13 to −1.86) |  | 0.07 (0.04–0.08) | 20.67 (13.93–26.76) | 0.05 (0.04–0.07) | 9.59 (6.98–11.57) | −1.79 (−1.96 to −1.62) |
| Australia | 0.35 (0.26–0.42) | 177.50 (133.39–212.99) | 0.30 (0.22–0.38) | 66.50 (48.79–83.79) | −2.7 (−3.22 to −2.18) |  | 0.02 (0.01–0.02) | 8.62 (6.46–10.34) | 0.02 (0.01–0.02) | 3.45 (2.45–4.39) | −2.29 (−2.88 to −1.69) |
| Brazil | 7.11 (5.19–8.71) | 725.26 (529.80–882.97) | 6.44 (4.76–7.85) | 251.06 (185.72–306.42) | −2.69 (−2.99 to −2.38) |  | 0.24 (0.18–0.30) | 27.35 (19.98–33.14) | 0.25 (0.18–0.30) | 9.75 (7.20–11.88) | −2.42 (−2.80 to −2.04) |
| Canada | 0.41 (0.31–0.50) | 125.95 (94.31–154.27) | 0.44 (0.31–0.57) | 61.87 (42.86–79.47) | −1.74 (−2.33 to −1.15) |  | 0.02 (0.01–0.02) | 5.68 (4.25–6.92) | 0.02 (0.02–0.03) | 2.95 (2.07–3.72) | −1.43 (−2.10 to −0.77) |
| China | 102.34 (70.55–137.94) | 1309.63 (910.34–1757.36) | 156.27 (108.33–205.49) | 753.99 (528.24–992.08) | −0.57 (−0.97 to −0.17) |  | 4.39 (3.07–5.91) | 67.38 (47.33–89.44) | 7.57 (5.30–9.95) | 38.83 (27.35–51.19) | −0.39 (−0.89 to 0.11) |
| France | 1.77 (1.33–2.12) | 220.80 (165.90–264.89) | 1.09 (0.80–1.35) | 76.16 (56.8–94.27) | −2.88 (−3.60 to −2.15) |  | 0.09 (0.07–1.06) | 10.18 (7.61–12.21) | 0.07 (0.05–0.08) | 3.84 (2.75–4.79) | −2.40 (−3.28 to −1.50) |
| Germany | 3.08 (2.41–3.69) | 248.89 (193.75–296.90) | 1.65 (1.23–2.03) | 85.77 (64.92–105.13) | −3.04 (−3.89 to −2.18) |  | 0.15 (0.11–0.18) | 11.01 (8.53–13.29) | 0.09 (0.07–0.12) | 4.15 (3.05–5.13) | −2.49 (−3.46 to −1.51) |
| India | 33.33 (23.64–43.55) | 674.06 (477.30–877.31) | 60.89 (43.68–77.84) | 490.11 (352.99–626.34) | −0.41 (−0.93 to 0.11) |  | 1.18 (0.83–1.54) | 27.01 (19.16–35.31) | 2.31 (1.66–2.97) | 19.90 (14.25–25.43) | −0.25 (−0.89 to 0.39) |
| Indonesia | 20.56 (14.98–25.48) | 1972.83 (1438.52–2459.17) | 44.67 (32.39–57.57) | 1769.79 (1300.21–2303.03) | 0.50 (−0.03 to 1.04) |  | 0.73 (0.53–0.91) | 82.26 (58.80–103.47) | 1.66 (1.21–2.15) | 77.73 (55.66–101.36) | 0.63 (−0.10 to 1.37) |
| Italy | 2.42 (1.85–2.83) | 276.39 (210.50–324.03) | 1.38 (0.96–1.71) | 93.46 (64.85–116.00) | −2.94 (−3.83 to −2.05) |  | 0.11 (0.09–0.13) | 12.57 (9.71–14.78) | 0.09 (0.06–0.11) | 4.86 (3.38–6.06) | −2.26 (−3.31 to −1.20) |
| Japan | 5.44 (4.14–6.43) | 322.56 (245.21–382.51) | 4.35 (3.20–5.41) | 139.26 (102.57–171.21) | −1.85 (−2.72 to −0.98) |  | 0.23 (0.18–0.27) | 14.04 (10.78–16.76) | 0.24 (0.17–0.30) | 5.62 (4.13–7.01) | −1.52 (−2.59 to −0.45) |
| Mexico | 1.06 (0.75–1.33) | 238.50 (169.38–297.26) | 1.88 (1.34–2.36) | 144.71 (103.41–181.60) | −0.87 (−1.42 to −0.32) |  | 0.04 (0.03–0.05) | 10.42 (7.47–13.08) | 0.07 (0.05–0.09) | 6.11 (4.43–7.66) | −0.81 (−1.47 to −0.14) |
| Republic of Korea | 3.51 (2.45–4.48) | 1206.78 (856.34–1532.81) | 1.10 (0.72–1.44) | 119.16 (77.4–156.28) | −6.82 (−7.29 to −6.35) |  | 0.14 (0.10–0.18) | 57.59 (41.08–73.08) | 0.05 (0.03–0.07) | 5.41 (3.51–7.29) | −6.65 (−7.18 to −6.12) |
| Russian Federation | 11.26 (8.65–13.15) | 621.00 (475.55–727.61) | 8.71 (6.54–10.44) | 386.35 (289.02–464.76) | −2.12 (−2.75 to −1.49) |  | 0.45 (0.35–0.53) | 26.17 (20.00–30.67) | 0.36 (0.27–0.43) | 15.39 (11.60–18.44) | −2.13 (−2.73 to −1.53) |
| Saudi Arabia | 0.49 (0.32–0.71) | 760.73 (487.37–1069.63) | 1.01 (0.65–1.40) | 392.30 (273.39–524.07) | −1.58 (−2.51 to −0.64) |  | 0.02 (0.01–0.02) | 32.85 (21.17–45.95) | 0.03 (0.02–0.04) | 16.77 (12.06–22.00) | −1.93 (−3.21 to −0.63) |
| South Africa | 1.66 (1.20–2.05) | 718.99 (527.08–889.35) | 3.25 (2.44–3.95) | 668.44 (499.52–810.49) | 0.28 (−0.31 to 0.88) |  | 0.06 (0.04–0.07) | 26.99 (19.34–33.58) | 0.12 (0.09–0.15) | 28.15 (21.26–34.34) | 0.64 (−0.09 to 1.38) |
| Turkey | 2.33 (1.62–3.05) | 654.30 (455.70–849.89) | 2.29 (1.56–2.96) | 245.11 (166.33–316.38) | −2.56 (−2.94 to −2.18) |  | 0.09 (0.06–0.12) | 28.88 (19.96–37.32) | 0.10 (0.07–0.13) | 11.78 (8.11–15.34) | −1.96 (−2.44 to −1.48) |
| United Kingdom | 1.76 (1.37–2.04) | 200.52 (155.93–232.88) | 1.05 (0.76–1.29) | 81.33 (58.91–99.24) | −2.83 (−3.53 to −2.12) |  | 0.09 (0.07–0.10) | 9.15 (7.11–10.61) | 0.06 (0.04–0.08) | 4.17 (3.00–5.14) | −2.24 (−3.07 to −1.40) |
| United States of America | 4.73 (3.54–5.71) | 152.22 (113.73–183.69) | 6.17 (4.34–7.77) | 110.59 (76.88–138.97) | −0.81 (−1.30 to −0.31) |  | 0.21 (0.16–0.26) | 6.53 (4.94–7.88) | 0.30 (0.21–0.38) | 4.92 (3.50–6.19) | −0.68 (−1.26 to −0.10) |

DALYs, disability-adjusted life years. ASDALYR, age-standardized disability adjusted of life years rate. ASMR, age-standardized mortality rate. EAPC, estimated annual percentage change.

**Table S3. Burden of subarachnoid hemorrhage attributable to hypertension in G20 countries, by nations, 1990–2021**

|  |  |  | DALYs |  |  |  |  |  | Mortality |  |  |
| --- | --- | --- | --- | --- | --- | --- | --- | --- | --- | --- | --- |
| **1990 cases**  **(×100000, 95% UI)** | **1990 ASDALYR**  **(per 100000, 95% UI)** | **2021 cases**  **(×100000, 95% UI)** | **2021 ASDALYR**  **(per 100000, 95% UI)** | **1990–2021 EAPC**  **(95% CI)** |  | **1990 cases**  **(×1000, 95% UI)** | **1990 ASMR**  **(per 100000, 95% UI)** | **2021 cases**  **(×1000, 95% UI)** | **2021 ASMR**  **(per 100000, 95% UI)** | **1990–2021 EAPC**  **(95% CI)** |
| Overall | 52.96 (36.47–71.22) | 128.12 (88.16–172.13) | 55.79 (40.49–70.62) | 64.58 (46.84–81.79) | −2.03 (−2.26 to −1.81) |  | 186.35 (125.76–250.02) | 4.85 (3.25–6.52) | 196.71 (143.36–249.92) | 2.32 (1.69–2.94) | −2.19 (−2.49 to −1.89) |
| Country |  |  |  |  |  |  |  |  |  |  |  |
| Argentina | 0.44 (0.28–0.59) | 137.18 (87.24–184.87) | 0.37 (0.26–0.45) | 68.84 (49.23–85.30) | −1.66 (−1.85 to −1.46) |  | 1.48 (0.96–1.96) | 4.69 (3.06–6.22) | 1.24 (0.90–1.52) | 2.25 (1.64–2.75) | −1.67 (−1.93 to −1.41) |
| Australia | 0.14 (0.10–0.17) | 73.14 (53.54–88.93) | 0.14 (0.10–0.18) | 34.93 (24.91–44.37) | −1.99 (−2.40 to −1.57) |  | 0.49 (0.36–0.59) | 2.56 (1.89–3.07) | 0.57 (0.40–0.73) | 1.25 (0.87–1.58) | −1.70 (−2.22 to −1.18) |
| Brazil | 1.49 (1.04–1.86) | 135.39 (95.48–168.02) | 2.36 (1.72–2.89) | 91.58 (66.59–112.42) | −0.64 (−0.90 to −0.37) |  | 3.89 (2.76–4.81) | 3.84 (2.77–4.73) | 7.58 (5.59–9.30) | 2.99 (2.20–3.67) | 0.03 (−0.31 to 0.36) |
| Canada | 0.20 (0.15–0.26) | 64.68 (47.02–81.55) | 0.20 (0.14–0.26) | 31.44 (21.39–41.24) | −1.91 (−2.43 to −1.39) |  | 0.68 (0.50–0.83) | 2.12 (1.58–2.63) | 0.82 (0.57–1.04) | 1.11 (0.77–1.43) | −1.36 (−1.97 to −0.75) |
| China | 21.71 (10.91–32.18) | 267.24 (130.02–393.3) | 12.68 (8.24–17.20) | 60.95 (39.50–82.88) | −4.48 (−4.98 to −3.98) |  | 87.86 (40.16–129.88) | 12.85 (5.72–18.75) | 52.31 (33.75–72.23) | 2.63 (1.70–3.62) | −4.75 (−5.34 to −4.15) |
| France | 0.37 (0.28–0.45) | 49.54 (36.55–60.77) | 0.40 (0.29–0.50) | 35.11 (25.66–44.43) | −0.42 (−1.00 to 0.16) |  | 1.38 (1.04–1.68) | 1.69 (1.27–2.07) | 1.71 (1.19–2.16) | 1.17 (0.84–1.46) | −0.15 (−0.95 to 0.66) |
| Germany | 0.91 (0.69–1.09) | 80.86 (61.23–97.65) | 0.61 (0.46–0.75) | 38.06 (28.03–47.23) | −2.13 (−2.81 to −1.44) |  | 3.09 (2.33–3.76) | 2.55 (1.92–3.09) | 2.52 (1.87–3.10) | 1.29 (0.96–1.58) | −1.65 (−2.50 to −0.79) |
| India | 5.06 (2.93–8.31) | 92.19 (52.85–153.57) | 8.40 (5.45–12.39) | 64.58 (42.02–95.23) | −0.63 (−1.05 to −0.22) |  | 14.91 (8.11–25.64) | 3.10 (1.64–5.49) | 26.09 (16.68–39.16) | 2.15 (1.37–3.24) | −0.56 (−1.11 to −0.01) |
| Indonesia | 1.76 (1.20–2.58) | 153.15 (103.6–238.31) | 3.25 (2.24–4.75) | 120.33 (82.91–180.09) | 0.05 (−0.37−0.46) |  | 5.10 (3.36–8.43) | 5.33 (3.40–9.44) | 9.74 (6.45–15.30) | 4.33 (2.82–7.19) | 0.13 (−0.50 to 0.77) |
| Italy | 0.42 (0.32–0.50) | 53.57 (40.14–63.61) | 0.31 (0.21–0.38) | 24.38 (16.98–30.41) | −1.81 (−2.55 to −1.07) |  | 1.44 (1.11–1.69) | 1.72 (1.30–2.02) | 1.47 (1.01–1.85) | 0.92 (0.63–1.15) | −0.84 (−1.80 to 0.14) |
| Japan | 2.64 (2.03–3.13) | 155.74 (119.53–185.46) | 2.14 (1.56–2.68) | 79.37 (58.08–98.76) | −1.86 (−2.61 to −1.10) |  | 8.56 (6.60–10.11) | 5.05 (3.89–5.98) | 7.95 (5.61–10.07) | 2.30 (1.67–2.84) | −1.91 (−2.84 to −0.97) |
| Mexico | 0.24 (0.16–0.31) | 46.33 (32.35–59.52) | 0.83 (0.59–1.05) | 62.13 (44.74–78.65) | 2.06 (1.62 to 2.51) |  | 0.64 (0.44–0.81) | 1.42 (1.01–1.78) | 2.68 (1.93–3.38) | 2.12 (1.53–2.67) | 2.65 (2.07 to 3.24) |
| Republic of Korea | 0.73 (0.47–1.04) | 220.49 (144.24–311.31) | 0.39 (0.26–0.52) | 43.56 (28.36–58.47) | −4.44 (−4.84 to −4.03) |  | 2.37 (1.53–3.38) | 8.45 (5.48–12.50) | 1.37 (0.91–1.85) | 1.49 (0.99–2.02) | −4.44 (−4.87 to −4.00) |
| Russian Federation | 1.79 (1.37–2.13) | 101.14 (76.86–120.29) | 2.24 (1.66–2.69) | 103.98 (76.05–125.44) | −0.40 (−1.16 to 0.36) |  | 5.55 (4.23–6.49) | 3.20 (2.44–3.76) | 8.32 (6.22–10.00) | 3.64 (2.72–4.39) | 0.04 (−0.89 to 0.97) |
| Saudi Arabia | 0.03 (0.02–0.04) | 34.61 (21.91–55.76) | 0.07 (0.04–0.11) | 21.93 (14.06–31.46) | −0.60 (−1.28 to 0.07) |  | 0.07 (0.04–0.12) | 1.14 (0.69–1.92) | 0.16 (0.09–0.25) | 0.70 (0.44–1.00) | −0.89 (−1.91 to 0.15) |
| South Africa | 0.07 (0.05–0.10) | 30.65 (22.42–38.99) | 0.15 (0.11–0.20) | 29.84 (21.88–37.82) | 0.53 (0.08 to 0.98) |  | 0.18 (0.13–0.23) | 0.82 (0.60–1.06) | 0.43 (0.30–0.54) | 0.92 (0.65–1.16) | 0.99 (0.39 to 1.60) |
| Turkey | 0.55 (0.34–0.92) | 140.74 (88.58–241.12) | 0.52 (0.34–0.69) | 54.62 (35.78–72.72) | −2.50 (−2.80 to −2.20) |  | 1.74 (1.06–3.12) | 5.09 (3.11–9.38) | 1.89 (1.22–2.57) | 2.10 (1.35–2.85) | −2.05 (−2.46 to −1.64) |
| United Kingdom | 0.86 (0.66–1.01) | 112.37 (85.94–132.78) | 0.46 (0.34–0.57) | 41.50 (30.23–51.10) | −3.22 (−3.75 to −2.69) |  | 3.08 (2.39–3.59) | 3.69 (2.85–4.31) | 2.02 (1.45–2.50) | 1.53 (1.10–1.89) | −2.58 (−3.27 to −1.88) |
| United States of America | 1.80 (1.33–2.23) | 61.77 (45.42–76.83) | 2.24 (1.55–2.82) | 43.77 (30.10–55.14) | −0.86 (−1.29 to −0.42) |  | 6.12 (4.61–7.41) | 2.00 (1.51–2.43) | 9.04 (6.40–11.40) | 1.57 (1.11–1.98) | −0.35 (−0.87 to 0.18) |

DALYs, disability-adjusted life years. ASDALYR, age-standardized disability adjusted of life years rate. ASMR, age-standardized mortality rate. EAPC, estimated annual percentage change.
